# Supplementary material for: Antibiotic Prophylaxis and DAIR Treatment in Primary Total Hip and Knee Arthroplasty, A National Survey in The Netherlands
Source: PubMed Central journal article supplement — J Bone Jt Infect. 2018 Jan 1;3(1):5–9. doi: 10.7150/jbji.20259 (PMC5744190; doi:10.7150/jbji.20259), 2018-01-01
Supplement: jbjiv03p0005s1.pdf [file jbjiv03p0005s1.pdf]

## Questionnaire

### General information

1. What is your profession?
2. In which institution are you employed?

### Hip

3. Is a set protocol used for perioperative management concerning THA?
4. Which systemic antibiotic is used as prophylaxis in primary THA?
5. How many doses of antibiotic prophylaxis are administered in primary THA?
6. Does the protocol describe reasons to deviate from standard antibiotic prophylaxis?
7. Does your institution have a set protocol to be used in case of suspected early infection?
8. In case of DAIR procedure, are modular parts exchanged?
9. In case of DAIR procedure, is this procedure registered in the Dutch national joint registry database?

### Knee

10. Is a set protocol used for perioperative actions concerning TKA?
11. Which systemic antibiotic is used as prophylaxis in primary TKA?
12. How many doses of antibiotic prophylaxis are administered in primary TKA?
13. Does the protocol describe reasons to deviate from standard antibiotic prophylaxis?
14. Does your institution have a set protocol to be used in case of suspected early infection?
15. In case of DAIR procedure, are modular parts exchanged?
16. In case of DAIR procedure, is this procedure registered in the Dutch national joint registry database?
